# Supplementary material
Source: PubMed Central journal article supplement (PMC5833560)
Supplement: jama-319-291-s001.pdf [file jama-319-291-s001.pdf]

## Supplementary Online Content

Jakobsen GS, Småstuen MC, Sandbu, et al. Association of bariatric surgery vs medical obesity treatment with long-term medical complications and obesity-related comorbidities. *JAMA*. doi:10.1001/jama.2017.21055

**eTable 1.** Definition of Drugs for Each Comorbid Disease

**eTable 2.** Definitions of Complications and Surgical Procedures According to *ICD-10 (International Statistical Classification of Diseases and Related Health Problems 10th Revision)* and NCSP (NOMESCO Classification of Surgical Procedures)

**eTable 3.** Odds Ratios and 95 % CIs for remission and New-Onset of Hypertension, Diabetes, Dyslipidemia, Depression Anxiety and Sleep Disorders, and Use of Opioids in Patients Receiving Surgical Compared With Specialized Medical Treatment

**eTable 4.** Laboratory Values

**eTable 5.** Sensitivity Analysis

**eFigure.** Overall Mortality of Patients Undergoing Medical or Surgical Treatment for Severe Obesity

**eAppendix 1.** Supplementary Information on the Different Treatment Options in Specialized Medical Treatment

**eAppendix 2.** Research Protocol

This supplementary material has been provided by the authors to give readers additional information about their work.

**eTable 1.** Definition of Drugs for Each Comorbid Disease

| <b>Comorbid Disease</b>     | <b>ATC code</b> | <b>Name</b>                                    |
|-----------------------------|-----------------|------------------------------------------------|
| Hypertension                | C02             | Antihypertensives                              |
|                             | C03             | Diuretics                                      |
|                             | C07             | Beta blocking agents                           |
|                             | C08             | Calcium channel blockers                       |
|                             | C09             | Agents acting on the renin- angiotensin system |
| Diabetes                    | A10A            | Insulins and analogues                         |
|                             | A10B            | Blood glucose lowering drugs, excl. Insulins   |
| Dyslipidemia                | C10             | Lipid modifying agents                         |
| Depression                  | N06A            | Antidepressants                                |
| Anxiety and sleep disorders | N05B            | Anxiolytics                                    |
|                             | N05C            | Hypnotics and sedatives                        |
| Opioid use                  | N02A            | Opioids                                        |

[https://www.whooc.no/atc\\_ddd\\_index/](https://www.whooc.no/atc_ddd_index/)

**eTable 2.** Definitions of Complications and Surgical Procedures According to *ICD-10* (*International Statistical Classification of Diseases and Related Health Problems 10th Revision*) and NCSP (NOMESCO Classification of Surgical Procedures)

| Term                                                                                                                                                                                                                                                                                                     | Codes (ICD-10 and NCSP)                                         | Code text                                                                                                                                                                                                                                                                                                                                                                                                       |
|----------------------------------------------------------------------------------------------------------------------------------------------------------------------------------------------------------------------------------------------------------------------------------------------------------|-----------------------------------------------------------------|-----------------------------------------------------------------------------------------------------------------------------------------------------------------------------------------------------------------------------------------------------------------------------------------------------------------------------------------------------------------------------------------------------------------|
| <b>Complications</b>                                                                                                                                                                                                                                                                                     |                                                                 |                                                                                                                                                                                                                                                                                                                                                                                                                 |
| Iron deficiency anaemia                                                                                                                                                                                                                                                                                  | D50                                                             | Iron deficiency anaemia                                                                                                                                                                                                                                                                                                                                                                                         |
| Hypoglycemia                                                                                                                                                                                                                                                                                             | E16.1, E16.2                                                    | Other hypoglycaemia, Hypoglycaemia, unspecified                                                                                                                                                                                                                                                                                                                                                                 |
| Vitamin- and mineral deficiency                                                                                                                                                                                                                                                                          | E50, E51, E52, E53, E54, E55, E56, E58, E59, E60, E61, E63, E64 | Vitamin A deficiency, Thiamine deficiency, Niacin deficiency [pellagra], Deficiency of other B group vitamins, Ascorbic acid deficiency, Vitamin D deficiency, Other vitamin deficiencies, Dietary calcium deficiency, Dietary selenium deficiency, Dietary zinc deficiency, Deficiency of other nutrient elements, Other nutritional deficiencies, Sequelae of malnutrition and other nutritional deficiencies |
| Protein-energy malnutrition                                                                                                                                                                                                                                                                              | E44, E46                                                        | Protein-energy malnutrition of moderate and mild degree, Unspecified protein-energy malnutrition                                                                                                                                                                                                                                                                                                                |
| Nausea and vomiting                                                                                                                                                                                                                                                                                      | R11                                                             | Nausea and vomiting                                                                                                                                                                                                                                                                                                                                                                                             |
| Gastroduodenal ulcers                                                                                                                                                                                                                                                                                    | K25, K26, K27, K28                                              | Gastric ulcer, Duodenal ulcer, Peptic ulcer, site unspecified, Gastrojejunal ulcer                                                                                                                                                                                                                                                                                                                              |
| Abdominal pain                                                                                                                                                                                                                                                                                           | R10                                                             | Abdominal and pelvic pain                                                                                                                                                                                                                                                                                                                                                                                       |
| <b>Surgical procedures</b>                                                                                                                                                                                                                                                                               |                                                                 |                                                                                                                                                                                                                                                                                                                                                                                                                 |
| Any gastrointestinal surgery                                                                                                                                                                                                                                                                             | J without (JDF, JFD)                                            | Digestive system and spleen excluded Bariatric operations on stomach and Intestinal bypass operations<br>For morbid obesity or hypercholesterolemia                                                                                                                                                                                                                                                             |
| Abdominal pain                                                                                                                                                                                                                                                                                           | R10                                                             | Abdominal and pelvic pain                                                                                                                                                                                                                                                                                                                                                                                       |
| Operations for abdominal pain                                                                                                                                                                                                                                                                            | R10 and J                                                       | Abdominal and pelvic pain and any code from Digestive system and spleen (NCSP)                                                                                                                                                                                                                                                                                                                                  |
| Operations for intestinal obstruction                                                                                                                                                                                                                                                                    | K56 and J                                                       | Paralytic ileus and intestinal obstruction without hernia and any code from Digestive system and spleen (NCSP)                                                                                                                                                                                                                                                                                                  |
| Operations on gallbladder                                                                                                                                                                                                                                                                                | JKA                                                             | Operations on gallbladder                                                                                                                                                                                                                                                                                                                                                                                       |
| Operation of incisional hernia                                                                                                                                                                                                                                                                           | JAD                                                             | Repair of incisional hernia                                                                                                                                                                                                                                                                                                                                                                                     |
| ICD-10: <a href="http://apps.who.int/classifications/icd10/browse/2016/en">http://apps.who.int/classifications/icd10/browse/2016/en</a><br>NCSP: <a href="https://norden.diva-portal.org/smash/get/diva2:970547/FULLTEXT01.pdf">https://norden.diva-portal.org/smash/get/diva2:970547/FULLTEXT01.pdf</a> |                                                                 |                                                                                                                                                                                                                                                                                                                                                                                                                 |

**eTable 3.** Odds Ratios and 95 % CIs for remission and New-Onset of Hypertension, Diabetes, Dyslipidemia, Depression Anxiety and Sleep Disorders, and Use of Opioids in Patients Receiving Surgical Compared With Specialized Medical Treatment. Adjusted for gender, age and BMI at baseline.

|                                    | <b>Odds Ratio (OR)</b> | <b>95% Confidence interval (CI)</b> |
|------------------------------------|------------------------|-------------------------------------|
| <b>Hypertension</b>                |                        |                                     |
| Remission                          | 4.9                    | 4.2-5.8                             |
| New-onset                          | 0.3                    | 0.2-0.4                             |
| <b>Diabetes</b>                    |                        |                                     |
| Remission                          | 10.8                   | 8.8-13.3                            |
| New-onset                          | 0.04                   | 0.02-0.08                           |
| <b>Dyslipidemia</b>                |                        |                                     |
| Remission                          | 5.5                    | 4.4-6.9                             |
| New-onset                          | 0.2                    | 0.2-0.3                             |
| <b>Depression</b>                  |                        |                                     |
| Remission                          | 1.2                    | 1.0-1.5                             |
| New-onset                          | 1.7                    | 1.5-2.1                             |
| <b>Anxiety and sleep disorders</b> |                        |                                     |
| Remission                          | 0.9                    | 0.7-1.1                             |
| New-onset                          | 1.5                    | 1.3-1.8                             |
| <b>Opioid use</b>                  |                        |                                     |
| Remission                          | 0.7                    | 0.6-0.8                             |
| New-onset                          | 1.5                    | 1.3-1.7                             |

**eTable 4. Laboratory Values**

eTable 4 a) Laboratory results, median (Q1 – Q3) at baseline and follow-up <sup>a</sup>

| Biomarker            | Surgical intervention       |                             | Medical intervention        |                             |
|----------------------|-----------------------------|-----------------------------|-----------------------------|-----------------------------|
|                      | Baseline                    | Follow-up                   | Baseline                    | Follow-up                   |
| Hemoglobin (g/100mL) | 14.1 (13.2-14.9)<br>(n=931) | 13.1 (11.8-14.1)<br>(n=807) | 14.1 (13.3-15.0)<br>(n=953) | 13.3 (11.9-14.3)<br>(n=456) |
| Ferritin (µg/L)      | 77 (41-153)<br>(n=930)      | 55 (22-122)<br>(n=787)      | 83 (40-153)<br>(n=953)      | 87 (44-158)<br>(n=455)      |
| Vitamin B12 (pmol/L) | 272 (214-347)<br>(n=930)    | 387 (272-571)<br>(n=781)    | 285 (222-360)<br>(n=953)    | 307 (235-408)<br>(n=302)    |
| Vitamin D (ng/mL)    | 50 (38-64)<br>(n=922)       | 58 (44-74)<br>(n=418)       | 50 (38-65)<br>(n=930)       | 60 (48-76)<br>(n=215)       |
| PTH (pg/mL)          | 76 (55-105)<br>(n=931)      | 68 (52-89)<br>(n=755)       | 73 (49-108)<br>(n=952)      | 75 (53-140)<br>(n=244)      |
| Ca, total (mg/dL)    | 9.3 (9.1-9.6)<br>(n=931)    | 9.3 (9.0-9.5)<br>(n=793)    | 9.3 (9.1-9.6)<br>(n=953)    | 9.3 (9.0-9.6)<br>(n=393)    |
| Ca, alb.corr (mg/dL) | 9.4 (9.3-9.6)<br>(n=931)    | 9.4 (9.2-9.6)<br>(n=793)    | 9.4 (9.2-9.6)<br>(n=953)    | 9.5 (9.2-9.7)<br>(n=393)    |
| Albumin (g/L)        | 42 (40-43)<br>(n=931)       | 40 (38-43)<br>(n=805)       | 42 (40-44)<br>(n=953)       | 40 (37-43)<br>(n=430)       |

<sup>a</sup> Follow-up are results collected > 3 months after intervention. Median (Q1-Q3) follow-up time is given in eTable 4 c

Post-treatment (follow-up) laboratory values were retrieved from the database at the Department of Laboratory Medicine at Vestfold Hospital Trust. The number (n) of patients that had laboratory testing done and results registered in this database are presented. The lower number of laboratory tests in the medical intervention group reflects clinical practice, as blood tests in non-operated patients are more seldom performed and often based on clinical indication.

eTable 4 b) Proportion of patients with results below or above cutoff at baseline and follow-up <sup>a</sup>

| Biomarker                   | Baseline         |                  | Follow-up        |                  | p-value <sup>b</sup> | Cutoff used                  |
|-----------------------------|------------------|------------------|------------------|------------------|----------------------|------------------------------|
|                             | Surgical         | Medical          | Surgical         | medical          |                      |                              |
| Hemoglobin (↓) <sup>c</sup> | 44/931<br>(5%)   | 56/953<br>(6%)   | 276/807<br>(34%) | 148/445<br>(33%) | .78                  | women 12 g/dL<br>men 13 g/dL |
| Ferritin (↓)                | 49/930<br>(5%)   | 60/953<br>(6%)   | 208/787<br>(26%) | 56/455 (12%)     | < .001               | women 15 μg/L<br>men 25 μg/L |
| Vit. B12 (↓)                | 47/930<br>(5%)   | 37/953<br>(4%)   | 53/781<br>(7%)   | 16/302 (5%)      | .45                  | 150 pmol/L                   |
| Vit. D (↓)                  | 441/922<br>(48%) | 458/930<br>(49%) | 160/418<br>(38%) | 92/215 (43%)     | .31                  | 20 ng/mL                     |
| PTH (↑) <sup>d</sup>        | 354/931<br>(38%) | 361/952<br>(38%) | 274/755<br>(36%) | 94/244 (39%)     | .58                  | 88 pg/mL (URL) <sup>e</sup>  |
| Ca, total (↓)               | 11/931<br>(1%)   | 11/953<br>(1%)   | 86/793<br>(11%)  | 65/393 (17%)     | .01                  | 8.6 mg/dL (LRL) <sup>f</sup> |
| Ca, alb.corr (↓)            | 2/931<br>(0.2%)  | 3/953<br>(0.3%)  | 19/793<br>(2%)   | 14/393 (4%)      | .34                  | 8.6 mg/dL (LRL) <sup>f</sup> |
| Albumin (↓)                 | 16/931<br>(2%)   | 21/953<br>(2%)   | 193/805<br>(24%) | 107/430<br>(25%) | .78                  | 36 g/L (LRL) <sup>f</sup>    |

<sup>a</sup> Follow-up are results collected > 3 months after intervention. Median (Q1-Q3) follow-up time is given in eTable 4 c

<sup>b</sup> Chi square test for difference in proportions between surgical and medical group at follow-up

<sup>c</sup> (↓) Proportion of patients with results below cutoff

<sup>d</sup> (↑) Proportion of patients with results above cutoff

<sup>e</sup> URL: Upper Reference Limit

<sup>f</sup> LRL: Lower Reference Limit

eTable 4 c) Follow-up time in months, median (Q1-Q3)

| <b>Biomarker</b>   | <b>Follow-up time (months)</b> |                             |
|--------------------|--------------------------------|-----------------------------|
|                    | <b>Surgical intervention</b>   | <b>Medical intervention</b> |
| Hemoglobin         | 31 (13-62)                     | 58 (27-83)                  |
| Ferritin           | 25 (11-60)                     | 49 (16-81)                  |
| Vitamin B12        | 23 (7-51)                      | 62 (31-88)                  |
| Vitamin D          | 44 (22-73)                     | 76 (58-93)                  |
| PTH                | 14 (5-35)                      | 58 (20-89)                  |
| Calcium, total     | 26 (12-61)                     | 59 (27-84)                  |
| Calcium, alb.corr. | 26 (12-61)                     | 59 (27-84)                  |
| Albumin            | 27 (12-61)                     | 59 (27-84)                  |

**eTable 5. Sensitivity Analysis**

eTable 5a) Odds ratio and relative risk

|                     | Excluded patients not undergoing gastric bypass |           |      |           | Excluded the rehabilitation centre group |           |      |           | Excluded the outpatient group |           |      |           |
|---------------------|-------------------------------------------------|-----------|------|-----------|------------------------------------------|-----------|------|-----------|-------------------------------|-----------|------|-----------|
|                     | OR                                              | 95 % CI   | RR   | 95 % CI   | OR                                       | 95 % CI   | RR   | 95 % CI   | OR                            | 95 % CI   | RR   | 95 % CI   |
| <b>Hypertension</b> |                                                 |           |      |           |                                          |           |      |           |                               |           |      |           |
| Remission           | 4.7                                             | 3.9-5.5   | 1.9  | 1.7-2.1   | 5.7                                      | 4.6-7.00  | 2.9  | 2.7-4.0   | 4.2                           | 3.3-5.1   | 1.4  | 1.1-1.7   |
| New-onset           | 0.3                                             | 0.3-0.5   | 0.4  | 0.3-0.6   | 0.3                                      | 0.3-0.4   | 0.4  | 0.3-0.5   | 0.3                           | 0.2-0.4   | 0.3  | 0.2-0.4   |
| <b>Diabetes</b>     |                                                 |           |      |           |                                          |           |      |           |                               |           |      |           |
| Remission           | 11.1                                            | 9.0-13.7  | 3.9  | 3.6-4.2   | 10.2                                     | 8.0-12.9  | 3.0  | 2.6-3.2   | 11.8                          | 8.9-15.6  | 4.6  | 3.5-5.4   |
| New-onset           | 0.05                                            | 0.03-0.08 | 0.06 | 0.04-0.09 | 0.03                                     | 0.02-0.06 | 0.03 | 0.02-0.07 | 0.07                          | 0.04-0.12 | 0.07 | 0.04-0.11 |
| <b>Dyslipidemia</b> |                                                 |           |      |           |                                          |           |      |           |                               |           |      |           |
| Remission           | 5.6                                             | 4.4-7.0   | 2.6  | 2.2-2.8   | 5.3                                      | 4.1-6.9   | 2.3  | 1.8-2.7   | 5.7                           | 4.6-7.0   | 2.7  | 2.3-2.6   |
| New-onset           | 0.2                                             | 0.2-0.3   | 0.2  | 0.2-0.3   | 0.2                                      | 0.1-0.3   | 0.2  | 0.1-0.3   | 0.3                           | 0.2-0.4   | 0.3  | 0.2-0.4   |
| <b>Opioid use</b>   |                                                 |           |      |           |                                          |           |      |           |                               |           |      |           |
| Remission           | 0.7                                             | 0.6-0.8   | 0.7  | 0.7-0.8   | 0.7                                      | 0.6-0.8   | 0.7  | 0.6-0.8   | 0.8                           | 0.6-0.9   | 0.8  | 0.6-0.9   |
| New-onset           | 1.5                                             | 1.3-1.7   | 1.3  | 1.2-1.4   | 1.5                                      | 1.3-1.8   | 1.5  | 1.3-1.9   | 1.4                           | 1.2-1.9   | 1.4  | 1.2-1.9   |



|                        | Excluded patients not undergoing gastric bypass |         |     |         | Excluded the rehabilitation centre group |         |     |         | Excluded the outpatient group |         |     |         |
|------------------------|-------------------------------------------------|---------|-----|---------|------------------------------------------|---------|-----|---------|-------------------------------|---------|-----|---------|
| <b>Depression</b>      |                                                 |         |     |         |                                          |         |     |         |                               |         |     |         |
| Remission              | 1.3                                             | 1.0-1.5 | 1.2 | 0.9-1.2 | 1.2                                      | 1.0-1.6 | 1.2 | 1.0-1.6 | 1.2                           | 0.9-1.6 | 1.2 | 0.9-1.6 |
| New-onset              | 1.8                                             | 1.5-2.2 | 1.8 | 1.5-2.0 | 1.8                                      | 1.5-2.2 | 1.8 | 1.5-2.1 | 1.7                           | 1.4-2.1 | 1.7 | 1.4-2.1 |
| <b>Sleep disorders</b> |                                                 |         |     |         |                                          |         |     |         |                               |         |     |         |
| Remission              | 0.9                                             | 0.8-1.1 | 0.9 | 0.8-1.1 | 1.1                                      | 0.9-1.4 | 1.1 | 0.9-1.4 | 1.0                           | 0.7-1.4 | 1.0 | 0.7-1.4 |
| New-onset              | 1.6                                             | 1.4-1.9 | 1.4 | 1.3-1.6 | 1.3                                      | 1.1-1.5 | 1.3 | 1.1-1.5 | 1.2                           | 0.9-1.6 | 1.2 | 0.9-1.6 |

eTable 5b) Absolute numbers in the sensitivity analyses

| Excluded patients not undergoing gastric bypass |     |     |     |     |     |     |     |     | Excluded the outpatient group |     |     |     |     |     |     |     | Excluded rehabilitation centre group |     |     |     |     |     |     |     |
|-------------------------------------------------|-----|-----|-----|-----|-----|-----|-----|-----|-------------------------------|-----|-----|-----|-----|-----|-----|-----|--------------------------------------|-----|-----|-----|-----|-----|-----|-----|
| Hypertension, remission                         |     |     |     |     |     |     |     |     | Hypertension, remission       |     |     |     |     |     |     |     | Hypertension, remission              |     |     |     |     |     |     |     |
| Year of follow up                               | 0   | 1   | 2   | 3   | 4   | 5   | 6   | 7   | 0                             | 1   | 2   | 3   | 4   | 5   | 6   | 7   | 0                                    | 1   | 2   | 3   | 4   | 5   | 6   | 7   |
| Medical (total)                                 | 467 | 454 | 447 | 441 | 421 | 343 | 237 | 153 | 249                           | 247 | 247 | 340 | 224 | 176 | 113 | 78  | 251                                  | 241 | 238 | 234 | 229 | 201 | 141 | 94  |
| Medical (N)                                     | 0   | 32  | 46  | 50  | 48  | 40  | 30  | 19  | 0                             | 17  | 22  | 32  | 36  | 38  | 33  | 26  | 0                                    | 13  | 22  | 24  | 23  | 21  | 17  | 11  |
| Surgical (total)                                | 394 | 388 | 385 | 354 | 281 | 198 | 128 | 50  | 430                           | 424 | 421 | 381 | 304 | 218 | 139 | 55  | 430                                  | 424 | 421 | 381 | 304 | 218 | 139 | 55  |
| Surgical (N)                                    | 0   | 113 | 165 | 144 | 108 | 72  | 51  | 22  | 0                             | 125 | 183 | 158 | 119 | 83  | 57  | 25  | 0                                    | 125 | 183 | 158 | 119 | 83  | 57  | 25  |
| Hypertension, new onset                         |     |     |     |     |     |     |     |     | Hypertension, new onset       |     |     |     |     |     |     |     | Hypertension, new onset              |     |     |     |     |     |     |     |
| Year of follow up                               | 0   | 1   | 2   | 3   | 4   | 5   | 6   | 7   | 0                             | 1   | 2   | 3   | 4   | 5   | 6   | 7   | 0                                    | 1   | 2   | 3   | 4   | 5   | 6   | 7   |
| Medical (total)                                 | 489 | 484 | 482 | 473 | 455 | 382 | 253 | 164 | 249                           | 247 | 247 | 340 | 224 | 176 | 113 | 78  | 249                                  | 247 | 247 | 340 | 224 | 176 | 113 | 78  |
| Medical (N)                                     | 0   | 38  | 50  | 65  | 75  | 66  | 56  | 48  | 0                             | 17  | 22  | 32  | 36  | 38  | 33  | 26  | 0                                    | 17  | 22  | 32  | 36  | 38  | 33  | 26  |
| Surgical (total)                                | 461 | 460 | 457 | 419 | 329 | 244 | 136 | 53  | 502                           | 501 | 498 | 453 | 355 | 262 | 149 | 57  | 502                                  | 501 | 498 | 453 | 355 | 262 | 149 | 57  |
| Surgical (N)                                    | 0   | 11  | 17  | 18  | 19  | 14  | 9   | 5   | 0                             | 12  | 17  | 19  | 20  | 15  | 10  | 5   | 0                                    | 12  | 17  | 19  | 20  | 15  | 10  | 5   |
| Diabetes, remission                             |     |     |     |     |     |     |     |     | Diabetes, remission           |     |     |     |     |     |     |     | Diabetes, remission                  |     |     |     |     |     |     |     |
| Year of follow up                               | 0   | 1   | 2   | 3   | 4   | 5   | 6   | 7   | 0                             | 1   | 2   | 3   | 4   | 5   | 6   | 7   | 0                                    | 1   | 2   | 3   | 4   | 5   | 6   | 7   |
| Medical (total)                                 | 255 | 246 | 244 | 238 | 226 | 182 | 124 | 72  | 144                           | 136 | 134 | 132 | 128 | 111 | 74  | 44  | 111                                  | 110 | 110 | 106 | 98  | 71  | 50  | 28  |
| Medical (N)                                     | 0   | 24  | 32  | 37  | 37  | 36  | 25  | 16  | 0                             | 13  | 18  | 17  | 22  | 24  | 18  | 12  | 0                                    | 11  | 14  | 20  | 15  | 12  | 7   | 4   |
| Surgical (total)                                | 222 | 219 | 217 | 203 | 164 | 112 | 74  | 31  | 236                           | 233 | 231 | 216 | 176 | 122 | 81  | 34  | 236                                  | 233 | 231 | 216 | 176 | 122 | 81  | 34  |
| Surgical (N)                                    | 0   | 133 | 165 | 161 | 118 | 77  | 44  | 17  | 0                             | 139 | 177 | 169 | 126 | 84  | 48  | 19  | 0                                    | 139 | 177 | 169 | 126 | 84  | 48  | 19  |
| Diabetes, new onset                             |     |     |     |     |     |     |     |     | Diabetes, new onset           |     |     |     |     |     |     |     | Diabetes, new onset                  |     |     |     |     |     |     |     |
| Year of follow up                               | 0   | 1   | 2   | 3   | 4   | 5   | 6   | 7   | 0                             | 1   | 2   | 3   | 4   | 5   | 6   | 7   | 0                                    | 1   | 2   | 3   | 4   | 5   | 6   | 7   |
| Medical (total)                                 | 701 | 692 | 685 | 676 | 650 | 543 | 360 | 245 | 347                           | 342 | 339 | 335 | 332 | 296 | 207 | 136 | 354                                  | 350 | 346 | 341 | 318 | 247 | 159 | 109 |
| Medical (N)                                     | 0   | 35  | 44  | 53  | 61  | 65  | 51  | 42  | 0                             | 26  | 34  | 36  | 40  | 43  | 35  | 28  | 0                                    | 9   | 10  | 17  | 21  | 22  | 16  | 14  |
| Surgical (total)                                | 633 | 629 | 625 | 570 | 446 | 330 | 190 | 72  | 696                           | 692 | 688 | 621 | 483 | 358 | 207 | 78  | 696                                  | 692 | 688 | 621 | 483 | 358 | 207 | 78  |
| Surgical (N)                                    | 0   | 1   | 2   | 2   | 0   | 3   | 2   | 2   | 0                             | 1   | 2   | 2   | 0   | 3   | 2   | 2   | 0                                    | 1   | 2   | 2   | 0   | 3   | 2   | 2   |

| Excluded patients not undergoing gastric bypass |     |     |     |     |     |     |     |     | Excluded the outpatient group |     |     |     |     |     |     |     |     | Excluded rehabilitation centre group |     |     |     |     |     |     |  |  |
|-------------------------------------------------|-----|-----|-----|-----|-----|-----|-----|-----|-------------------------------|-----|-----|-----|-----|-----|-----|-----|-----|--------------------------------------|-----|-----|-----|-----|-----|-----|--|--|
| Dyslipidemia, remission                         |     |     |     |     |     |     |     |     | Dyslipidemia, remission       |     |     |     |     |     |     |     |     | Dyslipidemia, remission              |     |     |     |     |     |     |  |  |
| Year of follow up                               | 0   | 1   | 2   | 3   | 4   | 5   | 6   | 7   | 0                             | 1   | 2   | 3   | 4   | 5   | 6   | 7   | 0   | 1                                    | 2   | 3   | 4   | 5   | 6   | 7   |  |  |
| Medical (total)                                 | 222 | 214 | 211 | 206 | 192 | 148 | 100 | 69  | 198                           | 196 | 195 | 174 | 145 | 106 | 69  | 47  | 97  | 95                                   | 93  | 91  | 81  | 53  | 34  | 22  |  |  |
| Medical (N)                                     | 0   | 23  | 27  | 29  | 28  | 24  | 16  | 11  | 0                             | 58  | 107 | 104 | 80  | 55  | 37  | 9   | 0   | 8                                    | 11  | 14  | 12  | 8   | 5   | 2   |  |  |
| Surgical (total)                                | 179 | 177 | 176 | 160 | 133 | 96  | 61  | 29  | 198                           | 196 | 195 | 174 | 145 | 106 | 69  | 34  | 198 | 196                                  | 195 | 174 | 145 | 106 | 69  | 34  |  |  |
| Surgical (N)                                    | 0   | 53  | 98  | 97  | 72  | 48  | 31  | 14  | 0                             | 58  | 107 | 104 | 80  | 55  | 37  | 18  | 0   | 58                                   | 107 | 104 | 80  | 55  | 37  | 18  |  |  |
| Dyslipidemia, new onset                         |     |     |     |     |     |     |     |     | Dyslipidemia, new onset       |     |     |     |     |     |     |     |     | Dyslipidemia, new onset              |     |     |     |     |     |     |  |  |
| Year of follow up                               | 0   | 1   | 2   | 3   | 4   | 5   | 6   | 7   | 0                             | 1   | 2   | 3   | 4   | 5   | 6   | 7   | 0   | 1                                    | 2   | 3   | 4   | 5   | 6   | 7   |  |  |
| Medical (total)                                 | 734 | 724 | 718 | 708 | 684 | 577 | 390 | 248 | 366                           | 359 | 355 | 352 | 349 | 312 | 215 | 133 | 368 | 365                                  | 363 | 356 | 335 | 265 | 175 | 115 |  |  |
| Medical (N)                                     | 0   | 31  | 37  | 47  | 54  | 59  | 50  | 36  | 0                             | 18  | 22  | 26  | 32  | 39  | 34  | 16  | 0   | 13                                   | 15  | 21  | 22  | 20  | 16  | 26  |  |  |
| Surgical (total)                                | 676 | 671 | 666 | 613 | 477 | 346 | 203 | 74  | 734                           | 729 | 724 | 660 | 514 | 374 | 219 | 78  | 734 | 729                                  | 724 | 660 | 514 | 374 | 219 | 78  |  |  |
| Surgical (N)                                    | 0   | 6   | 4   | 9   | 12  | 6   | 4   | 1   | 0                             | 6   | 5   | 9   | 12  | 7   | 5   | 1   | 0   | 6                                    | 5   | 9   | 12  | 7   | 5   | 1   |  |  |
| Depression, remission                           |     |     |     |     |     |     |     |     | Depression, remission         |     |     |     |     |     |     |     |     | Depression, remission                |     |     |     |     |     |     |  |  |
| Year of follow up                               | 0   | 1   | 2   | 3   | 4   | 5   | 6   | 7   | 0                             | 1   | 2   | 3   | 4   | 5   | 6   | 7   | 0   | 1                                    | 2   | 3   | 4   | 5   | 6   | 7   |  |  |
| Medical (total)                                 | 192 | 186 | 185 | 181 | 176 | 151 | 99  | 68  | 121                           | 117 | 116 | 113 | 112 | 100 | 56  | 49  | 121 | 117                                  | 116 | 113 | 112 | 100 | 56  | 49  |  |  |
| Medical (N)                                     | 0   | 32  | 48  | 57  | 57  | 58  | 34  | 29  | 0                             | 12  | 21  | 21  | 20  | 18  | 11  | 7   | 0   | 20                                   | 27  | 36  | 37  | 40  | 23  | 22  |  |  |
| Surgical (total)                                | 185 | 183 | 183 | 161 | 125 | 91  | 55  | 22  | 196                           | 194 | 194 | 169 | 132 | 98  | 60  | 25  | 196 | 194                                  | 194 | 169 | 132 | 98  | 60  | 25  |  |  |
| Surgical (N)                                    | 0   | 34  | 47  | 51  | 49  | 35  | 30  | 14  | 0                             | 37  | 50  | 53  | 51  | 39  | 32  | 14  | 0   | 37                                   | 50  | 53  | 51  | 39  | 32  | 14  |  |  |
| Depression, new onset                           |     |     |     |     |     |     |     |     | Depression, new onset         |     |     |     |     |     |     |     |     | Depression, new onset                |     |     |     |     |     |     |  |  |
| Year of follow up                               | 0   | 1   | 2   | 3   | 4   | 5   | 6   | 7   | 0                             | 1   | 2   | 3   | 4   | 5   | 6   | 7   | 0   | 1                                    | 2   | 3   | 4   | 5   | 6   | 7   |  |  |
| Medical (total)                                 | 764 | 752 | 744 | 733 | 700 | 574 | 391 | 253 | 370                           | 361 | 357 | 354 | 348 | 307 | 216 | 133 | 370 | 361                                  | 357 | 354 | 348 | 307 | 216 | 133 |  |  |
| Medical (N)                                     | 0   | 41  | 59  | 53  | 62  | 54  | 38  | 21  | 0                             | 22  | 32  | 22  | 26  | 26  | 20  | 10  | 0   | 22                                   | 32  | 22  | 26  | 26  | 20  | 10  |  |  |
| Surgical (total)                                | 670 | 665 | 659 | 614 | 485 | 351 | 209 | 81  | 736                           | 731 | 725 | 668 | 527 | 382 | 228 | 87  | 736 | 731                                  | 725 | 668 | 527 | 382 | 228 | 87  |  |  |
| Surgical (N)                                    | 0   | 58  | 61  | 62  | 58  | 65  | 34  | 15  | 0                             | 61  | 65  | 66  | 59  | 65  | 34  | 15  | 0   | 61                                   | 65  | 66  | 59  | 65  | 34  | 15  |  |  |

| Excluded patients not undergoing gastric bypass |     |     |     |     |     |     |     |     | Excluded the outpatient group          |     |     |     |     |     |     |     | Excluded rehabilitation centre group   |     |     |     |     |     |     |     |
|-------------------------------------------------|-----|-----|-----|-----|-----|-----|-----|-----|----------------------------------------|-----|-----|-----|-----|-----|-----|-----|----------------------------------------|-----|-----|-----|-----|-----|-----|-----|
| Anxiety and sleep disorders, remission          |     |     |     |     |     |     |     |     | Anxiety and sleep disorders, remission |     |     |     |     |     |     |     | Anxiety and sleep disorders, remission |     |     |     |     |     |     |     |
| Year of follow up                               | 0   | 1   | 2   | 3   | 4   | 5   | 6   | 7   | 0                                      | 1   | 2   | 3   | 4   | 5   | 6   | 7   | 0                                      | 1   | 2   | 3   | 4   | 5   | 6   | 7   |
| Medical (total)                                 | 258 | 251 | 247 | 243 | 235 | 196 | 138 | 85  | 151                                    | 145 | 143 | 141 | 137 | 119 | 80  | 55  | 107                                    | 106 | 104 | 102 | 98  | 77  | 58  | 30  |
| Medical (N)                                     | 0   | 57  | 67  | 78  | 73  | 74  | 48  | 35  | 0                                      | 26  | 32  | 38  | 36  | 42  | 25  | 22  | 0                                      | 31  | 35  | 40  | 37  | 32  | 23  | 13  |
| Surgical (total)                                | 224 | 222 | 221 | 199 | 160 | 115 | 75  | 31  | 242                                    | 240 | 239 | 215 | 173 | 127 | 83  | 35  | 242                                    | 240 | 239 | 215 | 173 | 127 | 83  | 35  |
| Surgical (N)                                    | 0   | 48  | 57  | 50  | 51  | 47  | 32  | 15  | 0                                      | 52  | 64  | 58  | 56  | 52  | 35  | 16  | 0                                      | 52  | 64  | 58  | 56  | 52  | 35  | 16  |
| Anxiety and sleep disorders, new onset          |     |     |     |     |     |     |     |     | Anxiety and sleep disorders, new onset |     |     |     |     |     |     |     | Anxiety and sleep disorders, new onset |     |     |     |     |     |     |     |
| Year of follow up                               | 0   | 1   | 2   | 3   | 4   | 5   | 6   | 7   | 0                                      | 1   | 2   | 3   | 4   | 5   | 6   | 7   | 0                                      | 1   | 2   | 3   | 4   | 5   | 6   | 7   |
| Medical (total)                                 | 698 | 687 | 682 | 671 | 641 | 529 | 352 | 236 | 340                                    | 333 | 330 | 326 | 323 | 288 | 201 | 127 | 358                                    | 354 | 352 | 345 | 318 | 241 | 151 | 109 |
| Medical (N)                                     | 0   | 60  | 71  | 70  | 79  | 75  | 48  | 30  | 0                                      | 35  | 43  | 41  | 42  | 43  | 35  | 16  | 0                                      | 25  | 28  | 29  | 37  | 32  | 13  | 14  |
| Surgical (total)                                | 631 | 626 | 621 | 576 | 450 | 327 | 189 | 72  | 690                                    | 685 | 680 | 622 | 486 | 353 | 205 | 77  | 690                                    | 685 | 680 | 622 | 486 | 353 | 205 | 77  |
| Surgical (N)                                    | 0   | 85  | 94  | 90  | 69  | 65  | 33  | 17  | 0                                      | 88  | 100 | 92  | 69  | 66  | 33  | 17  | 0                                      | 88  | 100 | 92  | 69  | 66  | 33  | 17  |
| Opioid use, remission                           |     |     |     |     |     |     |     |     | Opioid use, remission                  |     |     |     |     |     |     |     | Opioid use, remission                  |     |     |     |     |     |     |     |
| Year of follow up                               | 0   | 1   | 2   | 3   | 4   | 5   | 6   | 7   | 0                                      | 1   | 2   | 3   | 4   | 5   | 6   | 7   | 0                                      | 1   | 2   | 3   | 4   | 5   | 6   | 7   |
| Medical (total)                                 | 270 | 263 | 260 | 255 | 244 | 198 | 135 | 82  | 158                                    | 153 | 151 | 149 | 145 | 128 | 88  | 56  | 112                                    | 110 | 109 | 106 | 99  | 70  | 47  | 26  |
| Medical (N)                                     | 0   | 95  | 108 | 107 | 104 | 93  | 61  | 40  | 0                                      | 37  | 44  | 51  | 56  | 57  | 36  | 28  | 0                                      | 56  | 64  | 56  | 48  | 36  | 25  | 12  |
| Surgical (total)                                | 323 | 321 | 320 | 290 | 234 | 170 | 104 | 39  | 339                                    | 337 | 336 | 299 | 241 | 175 | 107 | 41  | 339                                    | 337 | 336 | 299 | 241 | 175 | 107 | 41  |
| Surgical (N)                                    | 0   | 87  | 96  | 91  | 83  | 66  | 53  | 19  | 0                                      | 93  | 102 | 95  | 85  | 69  | 55  | 21  | 0                                      | 93  | 102 | 95  | 85  | 69  | 55  | 21  |
| Opioid use, new onset                           |     |     |     |     |     |     |     |     | Opioid use, new onset                  |     |     |     |     |     |     |     | Opioid use, new onset                  |     |     |     |     |     |     |     |
| Year                                            | 0   | 1   | 2   | 3   | 4   | 5   | 6   | 7   | 0                                      | 1   | 2   | 3   | 4   | 5   | 6   | 7   | 0                                      | 1   | 2   | 3   | 4   | 5   | 6   | 7   |
| Medical (total)                                 | 686 | 675 | 669 | 659 | 632 | 527 | 355 | 329 | 333                                    | 325 | 322 | 318 | 315 | 279 | 193 | 126 | 353                                    | 350 | 347 | 341 | 317 | 248 | 162 | 113 |
| Medical (N)                                     | 0   | 116 | 126 | 124 | 133 | 105 | 73  | 44  | 0                                      | 57  | 64  | 63  | 72  | 56  | 51  | 32  | 0                                      | 59  | 62  | 61  | 61  | 49  | 22  | 12  |
| Surgical (total)                                | 532 | 527 | 522 | 485 | 376 | 272 | 160 | 64  | 593                                    | 588 | 583 | 538 | 418 | 305 | 181 | 71  | 593                                    | 588 | 583 | 538 | 418 | 305 | 181 | 71  |
| Surgical (N)                                    | 0   | 102 | 129 | 121 | 93  | 74  | 43  | 17  | 0                                      | 117 | 145 | 131 | 98  | 83  | 49  | 17  | 0                                      | 117 | 145 | 131 | 98  | 83  | 49  | 17  |

**eFigure.** Overall Mortality of Patients Undergoing Medical or Surgical Treatment for Severe Obesity

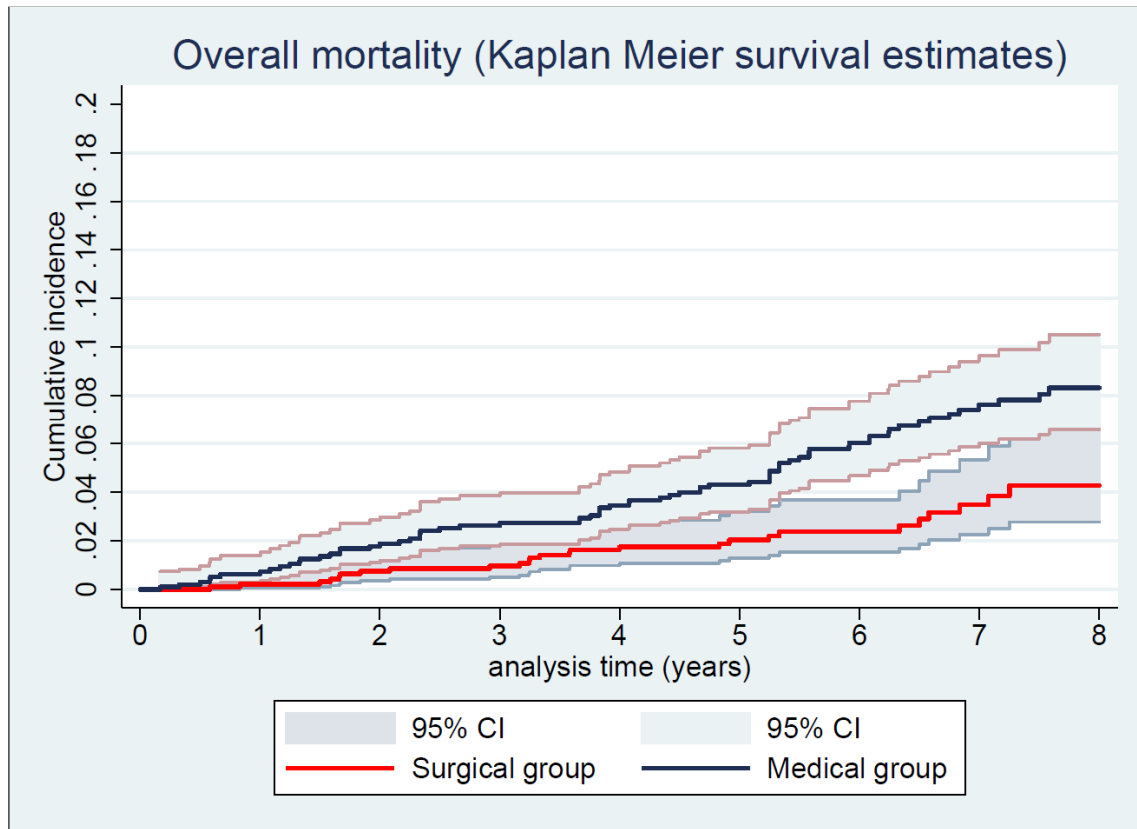

Number followed:

| Number of patients followed per year: |     |     |     |     |     |     |     |     |     |
|---------------------------------------|-----|-----|-----|-----|-----|-----|-----|-----|-----|
|                                       | 0   | 1   | 2   | 3   | 4   | 5   | 6   | 7   | 8   |
| Medical                               | 956 | 938 | 929 | 914 | 876 | 725 | 490 | 321 | 141 |
| Surgical                              | 932 | 925 | 919 | 837 | 659 | 480 | 288 | 112 | 25  |

Log-rank test,  $p < 0.001$

Medical group: median (range) follow-up 85 (2-121) months

Surgical group: median (range) follow-up 68 (7-110) months

## **eAppendix 1. Supplementary Information on the Different Treatment Options in Specialized Medical Treatment**

*Patients who opted for medical treatment alone could choose between individual or group-based programs, either in the outpatient clinic or at a rehabilitation center. The rehabilitation centers offered either a residential or an outpatient multidisciplinary intensive lifestyle intervention program as previously reported (see references in italics below).*

### **Outpatient treatment at the Morbid Obesity Center at Vestfold Hospital Trust**

All patients were examined by a medical doctor at their first visit to the center, and subsequently they were offered at least one consultation with a dietician, a physiotherapist, and a trained “obesity” nurse. During a second consultation with the doctor (3-6 months after the first), the patient and the doctor agreed on an individually tailored 1-year treatment program, but all patients were offered at least 2-years follow-up.

Patients who did not undergo surgery were offered a variety of individual or group-based conservative treatment options at the outpatient clinic. The treatment was individualized and consisted of consultations with members of the multidisciplinary team and group consultations with and without physical activity. All treatment options offered a simultaneous implementation of lifestyle or behavioural training, dietary change to reduce energy intake, and an increase in physical activity. The frequency of personal outpatient consultations varied considerably, from very few to weekly meetings if deemed necessary.

*Ref. Jakobsen GS, Hofso D, Roislien J, et al. Morbidly obese patients--who undergoes bariatric surgery? Obesity surgery. 2010;20(8):1142-1148*

### **Evjeklinikken**

Evjeklinikken is a rehabilitation center specializing in the care of morbidly obese patients. Using a cognitive approach the program at this center aimed to induce a weight loss of at least 10%. Each patient was motivated to increase their physical activity and to normalize their eating habits. The 1-year lifestyle program comprises four stays at the rehabilitation center lasting for either 1 week or 4 weeks. The daily program was divided between organized physical activity (3–4 h) and different psychosocially oriented interventions. The interventions involved individual consultations with a medical doctor, a nutritionist, a physiotherapist and a trained nurse. Those leading the counseling interviews were trained in motivational interviewing, a client-centered counseling style that aims to invoke behavior change. The patients also took part in group sessions focusing on emotional aspects of sedentary behavior as well as classroom lessons on topics related to nutrition, physical activity and co-morbidities. No special diet or weight-loss drugs were prescribed, but patients were encouraged to follow the guidelines of the Norwegian National Council of Nutrition, which recommend that the daily intake of protein, fat, carbohydrate and alcohol should account respectively for 10–20, <30, 50–60 and <5% of energy consumed. Outside of these stays, patients were contacted by phone once every 2

weeks. They were encouraged to self-monitor their eating habits and physical activities, as well as to visit their general practitioner for a consultation and weight control check once every 4 weeks.

*Ref. Hofso D, Nordstrand N, Johnson LK, et al. Obesity-related cardiovascular risk factors after weight loss: a clinical trial comparing gastric bypass surgery and intensive lifestyle intervention. European journal of endocrinology / European Federation of Endocrine Societies. 2010;163(5):735-745*

### **The Clinic of Physical Medicine and Rehabilitation in Stavern**

The Clinic of Physical Medicine and Rehabilitation in Stavern offered a 1-year outpatient intensive lifestyle intervention program with a 3-year additional less intensive follow-up.

The first 12 weeks included treatment sessions 3 days per week, with patients participating in two supervised training sessions for 60-90 min and lectures on nutrition, physical activity, and motivation each day. Patients received a dietary plan with an energy restriction of 1000 kcal/day of the calculated total energy expenditure at baseline. Study participants had individual sessions with qualified personnel who used elements of a lifestyle modification intervention in order to invoke behavioral change.

During weeks 13-52, patients received monthly follow-up, alternating between group based and individual sessions every other month. Patients were advised to maintain physical activity for 60-90 min per day in order to increase or maintain weight loss, and during the individual sessions patients were told to describe their physical activity level.”

In addition, the participants were offered three year follow-up with quarterly group based sessions and semiannually individual sessions with qualified personnel. The group based sessions lasted for 3 hours and included a lifestyle modification intervention including nutritional and physical activity lectures.

*Ref. Gjevestad E, Hjelmæsæth J, Sandbu R, Nordstrand N. Effects of intensive lifestyle intervention and gastric bypass on aortic stiffness: A 1-year nonrandomized clinical study. Obesity (Silver Spring). 2015 Jan;23(1):37-45. doi:10.1002/oby.20880. Epub 2014 Aug 30. PubMed PMID: 25174845.*

## **eAppendix 2. Research Protocol**

### **The Long-Term Effect of Treatment of Morbid Obesity**

#### **LETMO – a cohort study**

**Revision of the protocol 30.10.2015:**

**”The Long-Term Effect of Treatment of Morbid Obesity”**

**Project number in REK 2010/2329**



**PhD Candidate**

**Gunn Signe Jakobsen**, cand. med. at the Morbid Obesity Center, South-Eastern Norway Regional Health Authority. Doctor with a specialisation at the department for Gastroenterological Surgery, Akershus University Hospital. Mobil: 916 25 647, email: [gunn.signe.jakobsen@siv.no](mailto:gunn.signe.jakobsen@siv.no)

**Project Leader and Main Supervisor**

**Jøran Hjelmesæth**, Leader of the Morbid Obesity Center, Vestfold Hospital Trust, and Professor at the Department for Endocrinology, Morbid Obesity and Preventive Medicine, Medical Clinic, the Institute for Clinical Medicine, the University of Oslo.

**Co-supervisor**

**Jens Kristoffer Hertel**, PhD, the Morbid Obesity Center, Vestfold Hospital Trust.

**Co-supervisor**

**Arild Nesbakken**, Professor, the Surgical Clinic, Oslo University Hospital

**Co-supervisor**

**Rune Sandbu**, dr.med, the Morbid Obesity Center and Department of Surgery, Vestfold Hospital Trust.

**Biostatistician**

**Milada Cvancarova Småstuen**, PhD, the Morbid Obesity Center, South-Eastern Norway Regional Health Authority, Vestfold Hospital Trust

## Contents

|                                                                                   |    |
|-----------------------------------------------------------------------------------|----|
| <b>Research Protocol</b> .....                                                    | 16 |
| <b>The Long-Term effect of Treatment of Morbid Obesity – A Cohort Study</b> ..... | 19 |
| <b>Background</b> .....                                                           | 19 |
| <b>Research Question and hypotheses</b> .....                                     | 22 |
| <b>Dataset and variables</b> .....                                                | 23 |
| <b>Statistics and sample size</b> .....                                           | 24 |
| <b>Ethics and the protection of personal identification information</b> .....     | 25 |
| <b>The Project’s Scientific Importance</b> .....                                  | 26 |
| <b>Plan of Work</b> .....                                                         | 27 |
| <b>Financing</b> .....                                                            | 27 |
| <b>References</b> .....                                                           | 28 |

# The Long-Term effect of Treatment of Morbid Obesity

## – A Cohort Study

### Background

Morbid obesity is an increasing health problem which is associated with reduced quality of life and both increased risk of a number of illnesses as well as early death (1-3). Patients with morbid obesity represent a diverse group which has the right to the necessary healthcare. Obesity is a chronic illness which demands lifelong treatment and follow-up. Morbid obesity is defined as either a BMI  $\geq 35$  kg/m<sup>2</sup> with at least one obesity-related comorbidity, or a BMI  $\geq 40$  kg/m<sup>2</sup>. Every fifth Norwegian has obesity (BMI  $\geq 30$ ), and one out of fifty (2 %) has morbid obesity(4, 5). Studies with long follow-up have shown that obesity surgery can have positive effects upon quality of life, obesity-related comorbidities (such as hypertension, diabetes, obstructive sleep apnoea, anxiety/depression, as well as muscle and skeletal complaints), medicine usage and survival (6-11). Mortality up to 90 days after laparoscopic gastric bypass (figure 1) is low (0.06 %) (12), but surgical treatment also brings with it a lifelong risk of surgical complications such as an internal hernia (2-15 %) (13, 14), low blood sugar after meals (15) and brittle bone disease/osteoporosis (16). Non-surgical treatment gives less effective weight reduction, but many studies have shown that behavioural therapy with a focus upon calorie-restriction and physical activity, supplemented by pharmacotherapy, can also lead to lasting weight loss and positive effects in terms of comorbidities and quality of life (17-21).

The Morbid Obesity Center (MOC) at Vestfold Hospital Trust in Tønsberg is a regional competence center within the South-Eastern Norway Regional Health Authority. The course of treatment for adult patients with morbid obesity starts at the general practitioner who refers the patient to the local health trust, which can then itself refer the patient to a regional competence center. The course of treatment at MOC begins with a consultation at a multi-disciplinary policlinic, after which there are two alternative courses of treatment available: either surgical treatment or a conservative/medical approach. In 2010, 590 new patients underwent a consultation and treatment at the MOC policlinic, with 200 patients operated upon due to morbid obesity, of which the majority (>90 %) underwent laparoscopic gastric bypass (see figure 1). The policlinic at MOC had a total of 5325 registered consultations in 2010. During the period of 2005-2010 the conservative medical treatment consisted of a multi-disciplinary treatment at MOC, taking the form of either individual consultations or group treatment, or day/night stays at a rehabilitation centre.

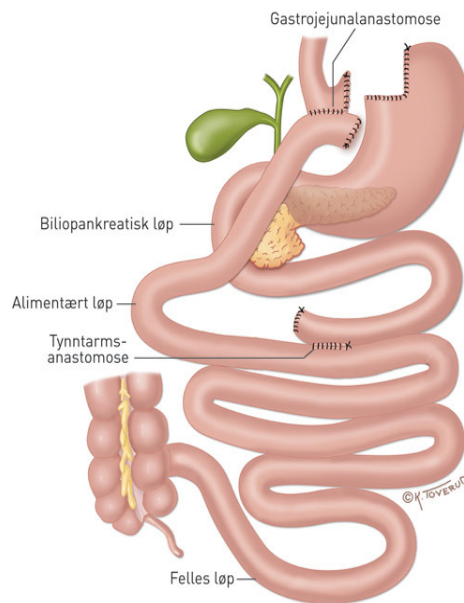

The Journal of the Norwegian Medical Association, 2011; 131: 1887-92

Figure 1: Gastric bypass. (22)

Since 2005, the MOC's Register and Biobank study has processed the prospective clinical data registration of all newly referred patients, in addition to beginning a biobank. As a result, the data and blood of some 4400 patients have been collected, and each year around 400 new patients are added to the register. Data and blood tests from the initial round of patients have formed the basis for later prospective longitudinal studies for the evaluation and comparison of the different treatment offers. Data in the register is and will be used to quality check the study through the measurement of treatment results, procedures and measures taken in relation to individual patients. The Register will also be able to reveal whether the services offered are safe and effective, as well as contributing to future research on the consequences of overweight, obesity and obesity related comorbidities. Through increased usage of the register data and access to other registers we will be able to follow the treatment population over time, and thus hopefully contribute to the improvement of the public health.

A 2014 report by the Knowledge Centre for the Health Services entitled "Long-term effects of bariatric surgery" reviewed the available research on the long-term effect of obesity surgery

compared with both non-surgical treatment and no specific treatment (23). The report concluded that “Bariatric surgery may reduce prevalence of type 2 diabetes mellitus and remission of hypertension. The quality of evidence is moderate for diabetes and low for hypertension.” And that “The largest and most important weakness is the lack of large studies of good quality with long-term follow-up.”

There are varying results from studies which look at the effect of obesity surgery on high blood pressure and use of blood pressure medicines. Studies with one to two years follow-up have shown that over half of the patients operated on for obesity have stopped taking anti-hypertensive medication (24-26). The SOS (Swedish Obese Subjects) study showed a significant difference in the incidence of hypertension between those operated upon and those not operated upon, but that this difference could not be replicated at ten year follow-up(27). By comparing gastric bypass operated patients with patients who have undergone either restrictive surgery (vertical banded gastroplasty or gastric banding) or conservative treatment, the SOS study showed a lasting reduction in the usage of blood pressure medicines in the gastric bypass operated patients only (28). In the Look AHEAD study, in which patients with type 2 diabetes and obesity underwent intensive lifestyle treatment, a steady increase in the number of patients who used anti-hypertensive medicines was shown over the course of a ten year follow-up, from 70 % to 85 % respectively (20) (supplementary appendix p.27). By contrast with the Look AHEAD study, we have previously found a 23% remission of hypertension after a year in patients undergoing a conservative treatment for morbid obesity (26).

Prescription drugs are the most common form of treatment in the Norwegian health service. In 2013, 3.5 million individuals (69% of Norway’s population) collected prescription drugs at a chemist at least once (29). Medicine usage has previously been used as an effect measure in studies comparing obesity surgery and non-surgical treatment, both as the sum of the number of medicines used to treat, for example, hypertension, or as the change in the usage of a specific type of medicine, for example, beta-blockers (24, 30). The Norwegian Prescription Database provides statistics on the use of prescription drugs in Norway. The register is based upon the unique 11 digit identification number which each citizen in Norway has, and upon application researchers can access data on which medicines have been collected from chemists in Norway. By combining this database with other health registers (for instance, the MOC Register and Biobank study) one can evaluate how the medicine usage of patients treated for morbid obesity changes after measures taken to reduce obesity. Data from the Norwegian Prescription Database can thus give epidemiological estimates (prevalence and incidence) of different obesity related comorbidities after different obesity-

reducing measures, as well as give estimates of treatment length, differences in usage, problematic usage of different medicines and usage of more than one medicine.

## **Research Question and hypotheses**

The main purpose of this study is, in combination with data from the Register and Biobank study and follow-up data from the Norwegian Prescription Database, to compare the long-term effects (4-10 years) of surgical and non-surgical treatment of morbid obesity on obesity related comorbidities by studying changes in medicine usage after treatment.

### **Hypotheses**

1. Primary hypothesis: As compared to non-surgical treatment, bariatric surgery will be associated with higher rates of remission, and lower rates of new-onset drug treated hypertension during a follow-up period of  $\leq 10$  years.
2. Secondary hypotheses: Changes in the usage of other drugs, particularly drugs related to obesity related comorbidities, will differ significantly between patients undergoing bariatric surgery or non-surgical treatment during the follow-up period.

### **Participants and study design**

In the period 2005-2015, the MOC's Register and Biobank study has processed the prospective registration of data from all newly referred patients. Necessary permission has been granted in order to use the data set, and all information has been anonymised. This register study has not meant an increase in the number of patient examinations beyond normal process at MOC. The patient's record at Vestfold Hospital Trust has been utilised during the course of treatment, with all information collected as a part of standard treatment stored in this record. In addition to the fact that patients have given their permission to the registration of information on their illness, treatment and results, patients have also given permission to having these details cross-checked with information in the patient record, as well as using this data in other registers when relevant (e.g. the Cancer Registry of Norway and the Norwegian Cause of Death Registry).

The Norwegian Prescription Database is not explicitly mentioned in the information and consent letter each patient signed. Using data from this database must therefore fulfil the register's prerequisite of anonymity. To what extent a data set actually fulfils this demand for anonymity depends upon a specific assessment, which in most cases, the Prescription Database is best suited to give. We will thus apply to the Norwegian Data Protection Agency for a concession to make a pseudonym association between selected data from the MOC

Register and Biobank study and the Prescription database. See the chapter on "Ethics and protection of identifiable personal details" for more information on how we will inform patients about the project and the association with data from the Norwegian Prescription Database. We are of the opinion that the data set which we wish to associate with the Prescription Database will meet the demand of anonymity after the data set is collated (see the chapter on effect variables and methods). The Register and Biobank study is approved by the Regional Committee for Health Ethics (REK Sør, S-05175) and is registered with the Data Protection Authority (Pnr 14029). The formation of the research biobank is approved by the Norwegian Directorate of Health.

This is a part retrospective and part prospective comparative cohort study exploring changes in the medicine usage of patients with morbidly obesity after either surgery or conservative obesity treatment. Patients were included in the Register and Biobank study during 2005 to 2010. Data on patient treatment has been registered retrospectively using the patient journal and operation reports from the electronic patient journal. This retrospective registration of data took place in May 2013, with the data on treatment choice together with all baseline data from the Register and Biobank study forming a research database for each individual patient. Each treatment underwent was decided upon by the patient in cooperation with healthcare professionals at MOC (31).

### **Dataset and variables**

The primary endpoint is change in the usage of antihypertensive medicines during the 4-10 years post treatment for morbid obesity. Treatment groups will be compared (surgical or conservative treatment) with consideration given to the cumulative number of patients who cease/begin to use blood pressure medicines, as well as changes in the number and type of medicines taken. As an extension of this, we also wish to compare changes in the usage of other drugs related to obesity or obesity related comorbidities.

The MOC's Register and biobank study includes, amongst other things, data on medicine usage, comorbidities and weight, and will be used as a source of baseline data. The database is updated with treatment choice and operation date for those patients registered by July 2010. This data was retrieved from patient journals and was registered in May 2013. We wish to associate the following variables from the Register and Biobank study with the Prescription database: Month and year of treatment at MOC; Follow-up beyond the first consultation; Operation at MOC (Yes/No); Operation month and year; Operation code; Conservative Treatment (YES/NO, and name of rehabilitation center); Month and year of conservative treatment; Height (m); Weight (kg), waistline (cm); Hip measurement (cm); Sex; Age at the start of treatment; Ethnicity; Smoker; Alcohol; Obesity debut (Child, Youth, Adult);

Maximum weight; Age at maximum weight; Mortality YES/NO; Blood pressure; Additional illnesses (all illnesses for which medicine is taken, plus sleep apnoea).

We are of the opinion that the data set which we wish to associate with data from the prescription database contains neither directly nor indirectly identifiable data due to the amount and type of variables, making the identification of patients simply unworkable. We would also stress both that the transfer of the research files will go to researchers, and not previous treatment givers or surgeons, as well as that LETMO is a stand-alone research project with a short project timeframe, with data from the prescription database not being traced back to the Register and Biobank study.

Data on medicine usage is prospectively registered in the prescription database, and will be associated, upon successful application, with data from the Register and Biobank study for each individual in the period 2005-2015. The prescription database will also give both date of the year and month of death, such that patients who are dead are not coded as having ceased using all medication.

### **Statistics and sample size**

Two previous studies have shown that over half of patients undergoing bariatric surgery cease using anti-hypertensive medicines after one to two years (25, 32). Intensive lifestyle intervention in patients with obesity and type 2 diabetes in the Look AHEAD-study was associated with 8% 1-year weight loss, but no statistically significant change in the proportion of patients who used anti-hypertensive medicines was shown (33). By contrast, 23% of patients had remission of hypertension one year after lifestyle intervention and a similar weight loss in the "Morbid Obesity treatment, Bariatric surgery versus Intensive Lifestyle intervention (MOBIL) study (26). The prevalence of anti-hypertension medication use in a previous cross-sectional study of 505 patients with morbid obesity from our group was 32% (n=79) in the group operated upon, and 35% (n=89) in the group which underwent lifestyle intervention (31). In the absence of relevant long-term data, we base the power calculations on extrapolation of data from the MOBIL study and speculate that 35% of patients in the surgical group and 15% of patients in the lifestyle intervention group may be off blood pressure medication after five years. If the 505 patients from our previous cross-sectional study are followed for 5-years, the present study has a power of more than 85% to reveal a difference between groups of 20% (35% vs. 15%) as given above (alfa 0,05) (34).

The results will be analysed using SPSS 21.0 and STATA SE v 10. The change in the usage of medicines will be analysed using longitudinal models. We will analyse at baseline patients treated with medicines, while those patients who did not receive medicinal treatment will each have an individual baseline, looking at the cessation of medicine usage and the start of



medicine usage. We will use landmark-analysis to pinpoint the time at which medicine usage resumed in those patients who stopped using medicine after treatment for morbid obesity, as well as in those patients who did not use medicine in the first, second or a specified number of years after treatment. In addition, we will plot cumulative hazard curves which will show the difference between the surgical and non-surgical treatment groups, in addition to other chosen covariates.

The two patient groups, those who underwent an operation for morbid obesity and those who received non-surgical treatment, are similar in terms of most background variables except age, period of overweight and weight (35). These variables will be included as covariates (possible confounding factors) in our longitudinal models.

### **Ethics and the protection of personal identification information**

All patients included in this study have given their written consent allowing data from the Register and Biobank to be used in research which investigates, amongst other things, whether “Surgical treatment of morbid obesity is better than non-surgical treatment in terms of the prevention and improvement of comorbidities”. Permission was also given allowing, when needed, the cross- checking of information in the database with that from the patient record. The information can be stored for up to 20 years for use in later research, with consent given allowing data to be associated with other registers (such as the Cancer Registry of Norway and the Norwegian Cause of Death Registry).

As has been previously discussed, the prescription database is not explicitly mentioned in the consent form patients signed. An association between data from the prescription database must therefore satisfy the prescription register’s prerequisite of anonymity. To what extent a data set actually fulfils this prerequisite depends upon a specific assessment, which in most cases, the Prescription Database is best suited to make. We are, nevertheless, of the opinion that the data set which we wish to associate with the prescription register contains neither directly nor indirectly identifiable data due to the amount and type of variables, making the identification of patients simply unworkable. We would also stress both that the transfer of the research file will go to researchers, and not previous treatment givers or surgeons, as well as that LETMO is a stand-alone research project with a short project timeframe, with data from the prescription database not being traced back to the Register and biobank study. In addition, patients will be informed by letter and on the MOC website about the study and the association with data from the Prescription Database.

All information received in connection with this study will be treated with the strictest confidentiality. Confidential information from the patient journal will be stored in the hospital's journal system, which is protected and all updates are logged.

When information is taken from the journal system and added to the database patients will be made anonymous, with only the project leader having the means of identifying individual patients. The study encompasses many patients recruited over a long time period, and the variables registered are general and applicable to many of the patients. It will thus not be possible to identify each patient on the basis of the published results.

The LETMO-project will be registered with the Norwegian Centre for Research Data, and a concession will be applied for with the Data Protection Authority. When this concession is granted, a further application will be lodged with the Norwegian Institute of Public Health in order to access data from the Prescription database.

All data will be stored locally on a secure research server at Vestfold Hospital Trust. The main concern is that sensitive information should be transferred safely, with the server protected against unauthorised access, misuse and damage.

The associated research file used in this project, which uses health details from the Register and Biobank study and the Prescription Database, cannot be retraced to the Register and Biobank study. Vestfold Hospital Trust, in the form of the administrative director, is responsible for data protection.

### **The Project's Scientific Importance**

The results from this cohort of approximately 2000 treatment-seeking patients with morbid obesity undergoing different conservative and surgical programmes for lasting health behavioural changes have a relatively high external validity and generalizability. The study can therefore give clinically valuable information which can improve the future treatment choices of treatment seeking Nordic patients with morbid obesity, and, moreover, can contribute in the future to more individualised patient-specific treatment. Previously published data on the effect of morbid obesity treatment on high blood pressure has given diverging results, with the present study therefore able to improve our understanding of this topic. One of the study's strengths is that it compares two groups who have undergone different treatment for the same illness, as well as the fact that it is a consecutive study at one centre, that it has a long follow-up and prospectively collected follow-up data. The study's weaknesses are that it lacks the follow-up data on weight development as an explanatory variable, and cannot therefore be used to explore the question of comorbidities which are not

treated medically (for example, obstructive sleep apnoea and diet-regulated type 2 diabetes). These two groups have different baselines with respect to age, weight and period of overweight (35). There is, however, for the first 500 patients in the register, no statistically significant difference in the prevalence of comorbidity or medicine usage for the different comorbidities (31). The study results will be both published in international peer-assessed journals and presented at national and international conferences.

### **Plan of Work**

This study is a part of Gunn Signe Jakobsen's PhD project, which is scheduled to be completed part-time between 2008-2016. As of 2014, over the course of a two year research leave the candidate has published two articles as the main author and one as co-author. This study is the last part of the PhD project and will be completed as of 2015-16. The analyses and publication of the article are planned for the course of 2016.

### **Financing**

Up to and including 2013, Vestfold Hospital Trust and the MOC have given research grants and research funding to PhD candidates. The aforementioned candidate has received a wage from Vestfold Hospital Trust for a further 6 months. We will apply for external funding (6 months) up to the completion of the PhD project. If the external financing does not come to fruition then Vestfold Hospital Trust (MOC) will guarantee funding up until the project's completion – see the attached agreement, which includes the expenses associated with accessing data from the Prescription Database, in addition to a wage for the PhD candidate.

## References

1. Bhaskaran K, Douglas I, Forbes H, dos-Santos-Silva I, Leon DA, Smeeth L. Body-mass index and risk of 22 specific cancers: a population-based cohort study of 5.24 million UK adults. *Lancet*. 2014;384(9945):755-65.
2. Hu FB. *Obesity epidemiology*. Oxford; New York: Oxford University Press; 2008.
3. Obesity: preventing and managing the global epidemic. Report of a WHO consultation. *World Health Organ Tech Rep Ser*. 2000;894:i-xii, 1-253.
4. Ng M, Fleming T, Robinson M, Thomson B, Graetz N, Margono C, et al. Global, regional, and national prevalence of overweight and obesity in children and adults during 1980-2013: a systematic analysis for the Global Burden of Disease Study 2013. *Lancet*. 2014;384(9945):766-81.
5. Midthjell K, Lee CM, Langhammer A, Krokstad S, Holmen TL, Hveem K, et al. Trends in overweight and obesity over 22 years in a large adult population: the HUNT Study, Norway. *Clin Obes*. 2013;3(1-2):12-20.
6. Adams TD, Gress RE, Smith SC, Halverson RC, Simper SC, Rosamond WD, et al. Long-term mortality after gastric bypass surgery. *N Engl J Med*. 2007;357(8):753-61.
7. Buchwald H, Avidor Y, Braunwald E, Jensen MD, Pories W, Fahrenbach K, et al. Bariatric surgery: a systematic review and meta-analysis. *JAMA*. 2004;292(14):1724-37.
8. Cremieux PY, Ledoux S, Clerici C, Cremieux F, Buessing M. The impact of bariatric surgery on comorbidities and medication use among obese patients. *Obesity surgery*. 2010;20(7):861-70.
9. Karlsson J, Taft C, Ryden A, Sjostrom L, Sullivan M. Ten-year trends in health-related quality of life after surgical and conventional treatment for severe obesity: the SOS intervention study. *Int J Obes (Lond)*. 2007;31(8):1248-61.
10. Sjöström L, Narbro K, Sjöström CD, Karason K, Larsson B, Wedel H, et al. Effects of Bariatric Surgery on Mortality in Swedish Obese Subjects. *New England Journal of Medicine*. 2007;357(8):741-52.
11. Ristad H, Sovik TT, Hewitt S, Kristinsson JA, Fagerland MW, Bernklev T, et al. Changes in Health-Related Quality of Life After Gastric Bypass in Patients With and Without Obesity-Related Disease. *Obesity surgery*. 2015.
12. Registry SSOS. SOREGs årsrapport 2014 del 1 2015 [Available from: <http://www.ucr.uu.se/soreg/index.php/nyheter/60-arsrapport-2014-del-1>].
13. Iannelli A, Facchiano E, Gugenheim J. Internal hernia after laparoscopic Roux-en-Y gastric bypass for morbid obesity. *Obesity surgery*. 2006;16(10):1265-71.
14. Rodriguez A, Mosti M, Sierra M, Perez-Johnson R, Flores S, Dominguez G, et al. Small bowel obstruction after antecolic and antegastric laparoscopic Roux-en-Y gastric bypass: could the incidence be reduced? *Obesity surgery*. 2010;20(10):1380-4.
15. Hofso D, Jenssen T, Bollerslev J, Ueland T, Godang K, Stumvoll M, et al. Beta cell function after weight loss: a clinical trial comparing gastric bypass surgery and intensive lifestyle intervention. *European journal of endocrinology / European Federation of Endocrine Societies*. 2011;164(2):231-8.
16. Ahlin S, Peltonen, M., Anveden, L., Jacobson, P., Sjöholm, K., Svensson, P.A., Larsson, I., Naslund, I., Sjostrom, L., Carlsson, L.M. 22nd European Congress on Obesity (ECO2015), Prague, Czech Republic, May 6-9, 2015: Abstracts T08:OS3.3 Bariatric surgery increases the risk of osteoporosis and fractures in women in the Swedish Obese Subjects study. *Obesity facts*. 2015;8(suppl 1)(Suppl. 1):1-272.
17. Executive summary: Guidelines (2013) for the management of overweight and obesity in adults: a report of the American College of Cardiology/American Heart Association Task Force on Practice Guidelines and the Obesity Society published by the Obesity Society and American College of Cardiology/American Heart Association Task Force on Practice Guidelines. Based on a systematic review from the The Obesity Expert Panel, 2013. *Obesity*. 2014;22 Suppl 2:S5-39.

18. Look ARG. Eight-year weight losses with an intensive lifestyle intervention: the look AHEAD study. *Obesity*. 2014;22(1):5-13.
19. Look ARG. Effect of a long-term behavioural weight loss intervention on nephropathy in overweight or obese adults with type 2 diabetes: a secondary analysis of the Look AHEAD randomised clinical trial. *Lancet Diabetes Endocrinol*. 2014;2(10):801-9.
20. Look ARG, Wing RR, Bolin P, Brancati FL, Bray GA, Clark JM, et al. Cardiovascular effects of intensive lifestyle intervention in type 2 diabetes. *N Engl J Med*. 2013;369(2):145-54.
21. Williamson DA, Rejeski J, Lang W, Van Dorsten B, Fabricatore AN, Toledo K, et al. Impact of a weight management program on health-related quality of life in overweight adults with type 2 diabetes. *Arch Intern Med*. 2009;169(2):163-71.
22. Hofso D, Aasheim ET, Sovik TT, Jakobsen GS, Johnson LK, Sandbu R, et al. [Follow-up after bariatric surgery]. *Tidsskrift for den Norske laegeforening : tidsskrift for praktisk medicin, ny raekke*. 2011;131(19):1887-92.
23. Giske L, Lauvrak V, Elvsaas I-KØ, Hofmann B, Håvelsrud K, Vang V, et al. Long term effects of bariatric surgery. [www.kunnskapssenteret.no](http://www.kunnskapssenteret.no); Norwegian Knowledge Centre for the Health Services; 2014.
24. Schauer PR, Kashyap SR, Wolski K, Brethauer SA, Kirwan JP, Pothier CE, et al. Bariatric surgery versus intensive medical therapy in obese patients with diabetes. *N Engl J Med*. 2012;366(17):1567-76.
25. Malone M, Alger-Mayer SA. Medication use patterns after gastric bypass surgery for weight management. *Ann Pharmacother*. 2005;39(4):637-42.
26. Hofso D, Nordstrand N, Johnson LK, Karlsen TI, Hager H, Jenssen T, et al. Obesity-related cardiovascular risk factors after weight loss: a clinical trial comparing gastric bypass surgery and intensive lifestyle intervention. *European journal of endocrinology / European Federation of Endocrine Societies*. 2010;163(5):735-45.
27. Sjostrom L, Lindroos AK, Peltonen M, Torgerson J, Bouchard C, Carlsson B, et al. Lifestyle, diabetes, and cardiovascular risk factors 10 years after bariatric surgery. *N Engl J Med*. 2004;351(26):2683-93.
28. Hallersund P, Sjostrom L, Olbers T, Lonroth H, Jacobson P, Wallenius V, et al. Gastric bypass surgery is followed by lowered blood pressure and increased diuresis - long term results from the Swedish Obese Subjects (SOS) study. *PLoS One*. 2012;7(11):e49696.
29. Berg C, Karlstad, Ø., Mahic, M., Odsbu, I. The Norwegian Prescription Database 2009-20132014.
30. Mingrone G, Panunzi S, De Gaetano A, Guidone C, Iaiconelli A, Leccesi L, et al. Bariatric surgery versus conventional medical therapy for type 2 diabetes. *N Engl J Med*. 2012;366(17):1577-85.
31. Jakobsen GS, Hofso D, Roislien J, Sandbu R, Hjelmesaeth J. Morbidly obese patients--who undergoes bariatric surgery? *Obesity surgery*. 2010;20(8):1142-8.
32. Dixon JB, O'Brien PE, Playfair J, Chapman L, Schachter LM, Skinner S, et al. Adjustable gastric banding and conventional therapy for type 2 diabetes: a randomized controlled trial. *JAMA*. 2008;299(3):316-23.
33. Look Ahead Research Group, Pi-Sunyer X, Blackburn G, Brancati FL, Bray GA, Bright R, et al. Reduction in weight and cardiovascular disease risk factors in individuals with type 2 diabetes: one-year results of the look AHEAD trial. *Diabetes care*. 2007;30(6):1374-83.
34. Altman DG. *Practical Statistics for Medical Research*: Taylor & Francis; 1990.
35. Valderhaug TG, Hjelmæsæth, J., Sandbu, R., Aasheim, E.T., Hertel, J.K. . The utility of obesity staging classification system in selecting Persons for bariatric surgery T08:OS2.6 22nd European Congress on Obesity (ECO2015), Prague, Czech Republic, May 6-9, 2015: Abstracts. *Obesity facts*. 2015;8 Suppl 1:1-272.
